# Supplementary material
Source: PubMed Central journal article supplement (PMC2829274)
Supplement: NIHMS178936-supplement-S2.pdf [file NIHMS178936-supplement-S2.pdf]

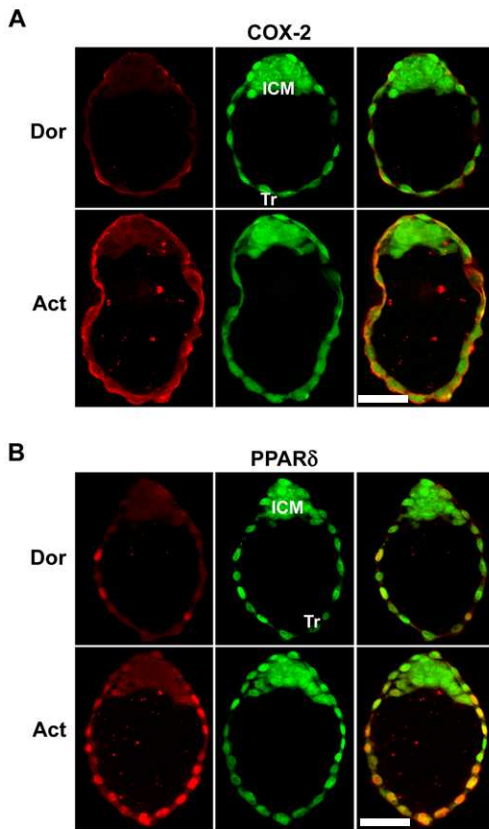

**Fig. S2** COX-2 and PPAR $\delta$  in blastocysts during activation. Expression of COX-2 and PPAR $\delta$  proteins were upregulated in trophectoderm (Tr) cells in activated blastocysts. Representative immunofluorescence staining images depict Cy3-labeled antigens as red, SYTO-13-labeled nuclei as green and merge as yellow. ICM, inner cell mass; Dor, dormant; Act, activated. Bar, 50  $\mu$ M.
