# Supplementary material
Source: PubMed Central journal article supplement (PMC2829274)
Supplement: NIHMS178936-supplement-Suppl__Table_1.pdf [file NIHMS178936-supplement-Suppl__Table_1.pdf]

**Table S1. Antibodies used in this study.**

| <b>Name</b>                               | <b>Epitope</b>                                                      | <b>Source</b> | <b>Company (Catalog No.)</b>           |
|-------------------------------------------|---------------------------------------------------------------------|---------------|----------------------------------------|
| $\beta$ -Catenin                          | mouse $\beta$ -Catenin (571-781)                                    | Mouse         | BD Transduction Laboratories™ (610154) |
| Phospho $\beta$ -Catenin (Ser33/37/Thr41) | human $\beta$ -Catenin (phospho-peptide)                            | Rabbit        | Cell Signaling (9561)                  |
| Dephospho $\beta$ -Catenin (8E7)          | human $\beta$ -Catenin (36-44)                                      | Mouse         | Upstate (05-665)                       |
| Wnt3a                                     | <i>E.coli</i> -derived rmWnt3a                                      | Rat           | R&D (MAB 1324)                         |
| Wnt4 (M-70)                               | mouse Wnt4 (1-70)                                                   | Rabbit        | Santa Cruz (SC-13962)                  |
| Wnt5a (C-16)                              | human Wnt5a (internal region)                                       | Goat          | Santa Cruz (SC-23698)                  |
| Frizzled 2                                | NS0-derived rmFrizzled 2 (extracellular CRD)                        | Goat          | R&D (AF1307)                           |
| Frizzled 4                                | NS0-derived rmFrizzled 4 (extracellular CRD)                        | Goat          | R&D (FCY01)                            |
| LRP5                                      | human LRP5 (C-terminus)                                             | Rabbit        | Zymed (36-5400)                        |
| LRP6                                      | mouse LRP6 (N-terminus)                                             | Rabbit        | Zymed (36-5300)                        |
| Kremen 1                                  | NS0-derived rmKremen-1 (extracellular domain)                       | Goat          | R&D (KDY01)                            |
| Kremen 2                                  | NS0-derived rmKremen-2 (extracellular domain)                       | Goat          | R&D (AF1764)                           |
| Dvl 1 (10B5)                              | human Dvl 1 (150-215)                                               | Goat          | R&D (AF3316)                           |
| Dvl 2 (10B5)                              | mouse Dvl 2 (594-736)                                               | Mouse         | Santa Cruz (SC-8026)                   |
| Dvl 3 (N-19)                              | human Dvl 3 (N-terminus)                                            | Goat          | Santa Cruz (SC-26504)                  |
| DKK1 (Y-17)                               | human DKK1 (internal region)                                        | Goat          | Santa Cruz (SC-14949)                  |
| DKK1 (120)                                | human DKK1 (1-120)                                                  | Rabbit        | Santa Cruz (SC-25516)                  |
| DKK2 (2A2)                                | human DKK2 (full length)                                            | Mouse         | abcam (ab19024)                        |
| sFRP1 (H-90)                              | human sFRP1 (161-250)                                               | Rabbit        | Santa Cruz (SC-13939)                  |
| c-Myc (C-19)                              | human c-Myc (C-terminus)                                            | Rabbit        | Santa Cruz (SC-788)                    |
| c-Myc (9E10)                              | human c-Myc (408-439)                                               | Rabbit        | Santa Cruz (SC40)                      |
| Cdx2                                      | mouse full-length Cdx2                                              | Mouse         | BioGenex (MU392)                       |
| Nanog                                     | rmNanog (154-262)                                                   | Goat          | R&D (AF2729)                           |
| COX-2                                     | Mouse COX-2 (563-577)                                               | Rabbit        | Custom made                            |
| PPAR $\delta$                             | mouse PPAR $\delta$ (1-14)                                          | Rabbit        | ABR (PA1-823A)                         |
| Rho A (119)                               | human Rho A (internal region)                                       | Rabbit        | Santa Cruz (SC-179)                    |
| GST (B-14)                                | GST specific domain of a fusion protein encoded by a pGEX.3X vector | Mouse         | Santa Cruz (SC-138)                    |
